# Supplementary material for: Mimicking the C2 molecule: M2B2 and M3B2+ clusters (M = Li, Na) and the reactivity of the N-heterocyclic carbene bound Li2B2 complex
Source: Royal Society of Chemistry journal article supplement (doi:10.1039/d3cp02509h), 2023-01-01
Supplement: d3cp02509h1.pdf [file d3cp02509h1.pdf]

## Supporting information

# Mimicking the C<sub>2</sub> molecule: M<sub>2</sub>B<sub>2</sub> and M<sub>3</sub>B<sub>2</sub><sup>+</sup> Clusters (M = Li, Na) and the Reactivity of the N-Heterocyclic Carbene Bound Li<sub>2</sub>B<sub>2</sub> Complex

Yu-qian Liu,<sup>a</sup> Gai-ru Yan,<sup>a</sup> Li-juan Cui,<sup>a</sup> Bing Yan,<sup>a</sup> Sudip Pan,<sup>\*a</sup> and Zhong-hua  
Cui<sup>\*a,b</sup>

<sup>a</sup>*Institute of Atomic and Molecular Physics, Jilin University, Changchun 130023,  
China*

*E-mail: [sudip@jlu.edu.cn](mailto:sudip@jlu.edu.cn) (SP); [zcui@jlu.edu.cn](mailto:zcui@jlu.edu.cn) (ZC)*

<sup>b</sup>*Key Laboratory of Physics and Technology for Advanced Batteries (Ministry of  
Education), Jilin University, Changchun 130023, China*

**Table S1.** Calculated C-C/B-B vibrational stretching frequencies ( $\text{cm}^{-1}$ ) of the  $\text{C}_2$ ,  $\text{B}_2^{2-}$ ,  $\text{M}_2\text{B}_2$  and  $\text{M}_3\text{B}_2^+$  ( $\text{M} = \text{Li}, \text{Na}$ ) clusters at the PBE0-D3/cc-pVTZ level.

|                       | $\text{C}_2$ | $\text{B}_2^{2-}(\text{S})$ | $\text{B}_2^{2-}(\text{T})$ | $\text{Li}_2\text{B}_2$ | $\text{Na}_2\text{B}_2$ | $\text{Li}_3\text{B}_2^+$ | $\text{Na}_3\text{B}_2^+$ |
|-----------------------|--------------|-----------------------------|-----------------------------|-------------------------|-------------------------|---------------------------|---------------------------|
| $\nu(\text{C-C/B-B})$ | 1901.1       | 1095.9                      | 1037.3                      | 1185.1                  | 1131.2                  | 1189.0                    | 1134.8                    |

|                    | Deformation density                                                                | $\text{CO}_2$                                                                      |   | $\text{B}_2(\text{NHC})_2$                                                           |
|--------------------|------------------------------------------------------------------------------------|------------------------------------------------------------------------------------|---|--------------------------------------------------------------------------------------|
| $\Delta\rho_{(1)}$ | 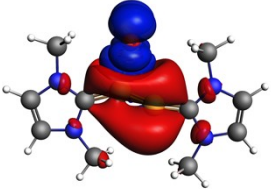  |   | ← |   |
|                    | $\Delta E_{\text{orb}(1)} = -140.9 \text{ kcal/mol}$<br>$ v_1  = 1.17$             | $v = 0.97$                                                                         |   | $v = -0.91$                                                                          |
| $\Delta\rho_{(2)}$ |  |  | → |  |
|                    | $\Delta E_{\text{orb}(2)} = -3.9 \text{ kcal/mol}$<br>$ v_2  = 0.18$               | $v = -0.01$                                                                        |   | $v = 0.01$                                                                           |

**Figure S1.** Plot of the deformation densities,  $\Delta\rho_{(1)-(2)}$  shown as the sum of  $\alpha$  and  $\beta$  electronic charge corresponding to  $\Delta E_{\text{orb}(1)-(2)}$  and the related interacting orbitals of  $\text{CO}_2$ - $\text{B}_2(\text{NHC})_2$  at the PBE0/TZ2P-ZORA level using  $\text{CO}_2(\text{S}) + \text{B}_2(\text{NHC})_2(\text{S})$  as interacting fragments. The eigenvalues  $v$  indicate the size of the charge flow, and the direction of charge flow is red→blue. The isovalue for  $\Delta\rho_{(1)-(2)}$  is 0.001 au.

|                    | Deformation density                                                                 | $\text{CO}_2$                                                                       |   | $\text{Li}_2\text{B}_2(\text{NHC})_2$                                                |                                                                                       |
|--------------------|-------------------------------------------------------------------------------------|-------------------------------------------------------------------------------------|---|--------------------------------------------------------------------------------------|---------------------------------------------------------------------------------------|
| $\Delta\rho_{(1)}$ | 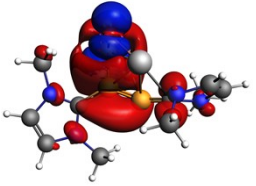 |  | ← |  |  |
|                    | $\Delta E_{\text{orb}(1)} = -279.1 \text{ kcal/mol}$<br>$ v_1  = 1.51$              | $v = 1.31$                                                                          |   | $v = -0.97$                                                                          | $v = -0.30$                                                                           |

|                    |                                                                                   |                                                                                   |   |                                                                                    |
|--------------------|-----------------------------------------------------------------------------------|-----------------------------------------------------------------------------------|---|------------------------------------------------------------------------------------|
| $\Delta\rho_{(2)}$ | 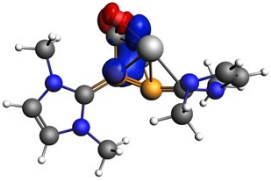 |  | → |  |
|                    | $\Delta E_{\text{orb}(2)} = -6.5 \text{ kcal/mol}$<br>$ v_2  = 0.19$              | $v = -0.01$                                                                       |   | $v = 0.01$                                                                         |

**Figure S2.** Plot of the deformation densities,  $\Delta\rho_{(1)-(2)}$  shown as the sum of  $\alpha$  and  $\beta$  electronic charge corresponding to  $\Delta E_{\text{orb}(1)-(2)}$  and the related interacting orbitals of  $\text{CO}_2\text{-B}_2(\text{NHC})_2$  at the PBE0/TZ2P-ZORA level using  $\text{CO}_2$  (S) +  $\text{Li}_2\text{B}_2(\text{NHC})_2$  (S) as interacting fragments. The eigenvalues  $v$  indicate the size of the charge flow, and the direction of charge flow is red→blue. The isovalue for  $\Delta\rho_{(1)-(2)}$  is 0.001 au.

|                    | Deformation density                                                                 | CO                                                                                  |   | $\text{B}_2(\text{NHC})_2$                                                            |
|--------------------|-------------------------------------------------------------------------------------|-------------------------------------------------------------------------------------|---|---------------------------------------------------------------------------------------|
| $\Delta\rho_{(1)}$ | 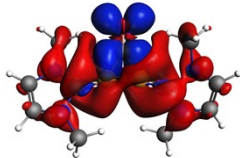  |  | ← |   |
|                    | $\Delta E_{\text{orb}(1)} = -197.7 \text{ kcal/mol}$<br>$ v_1  = 1.48$              | $v = 0.81$                                                                          |   | $v = -1.37$                                                                           |
| $\Delta\rho_{(2)}$ |  |  | → |  |
|                    | $\Delta E_{\text{orb}(2)} = -187.8 \text{ kcal/mol}$<br>$ v_2  = -1.11$             | $v = -1.21$                                                                         |   | $v = 0.78$                                                                            |
| $\Delta\rho_{(3)}$ |  |  | ← |  |
|                    | $\Delta E_{\text{orb}(3)} = -52.6 \text{ kcal/mol}$<br>$ v_3  = -0.65$              | $v = 0.31$                                                                          |   | $v = -0.36$                                                                           |

**Figure S3.** Plot of the deformation densities,  $\Delta\rho_{(1)-(3)}$  shown as the sum of  $\alpha$  and  $\beta$  electronic charge corresponding to  $\Delta E_{\text{orb}(1)-(2)}$  and the related interacting orbitals of  $\text{CO-B}_2(\text{NHC})_2$  at the PBE0/TZ2P-ZORA level using  $\text{CO}$  (S) +  $\text{B}_2(\text{NHC})_2$  (S) as interacting

fragments. The eigenvalues  $v$  indicate the size of the charge flow, and the direction of charge flow is red→blue. The isovalue for  $\Delta\rho_{(1)-(3)}$  is 0.001 au.  $\Delta E_{\text{orb}(1)}$  in Table 3 is the sum of  $\Delta\rho_{(1)}$  and  $\Delta\rho_{(3)}$ .

|                    | Deformation density                                                                 | CO                                                                                  |   | Li <sub>2</sub> B <sub>2</sub> (NHC) <sub>2</sub>                                    |                                                                                       |
|--------------------|-------------------------------------------------------------------------------------|-------------------------------------------------------------------------------------|---|--------------------------------------------------------------------------------------|---------------------------------------------------------------------------------------|
| $\Delta\rho_{(1)}$ | 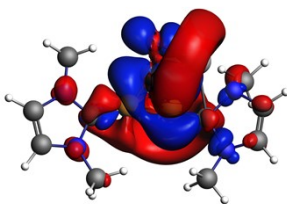   |    | ← |    |    |
|                    | $\Delta E_{\text{orb}(1)} = -265.3$<br>kcal/mol<br>$ v_1  = 1.91$                   | $v = 0.91$                                                                          |   | $v = -1.78$                                                                          | $v = 0.47$                                                                            |
| $\Delta\rho_{(2)}$ |  |  | → |  |                                                                                       |
|                    | $\Delta E_{\text{orb}(2)} = -234.8$<br>kcal/mol<br>$ v_2  = 1.25$                   | $v = -0.55$                                                                         |   | $v = 1.07$                                                                           |                                                                                       |
| $\Delta\rho_{(3)}$ |  |  | ← |  |  |
|                    | $\Delta E_{\text{orb}(3)} = -51.4$<br>kcal/mol<br>$ v_3  = 0.68$                    | $v = 0.29$                                                                          |   | $v = -0.18$                                                                          | $v = -0.07$                                                                           |

**Figure S4.** Plot of the deformation densities,  $\Delta\rho_{(1)-(3)}$  shown as the sum of  $\alpha$  and  $\beta$  electronic charge corresponding to  $\Delta E_{\text{orb}(1)-(2)}$  and the related interacting orbitals of CO-Li<sub>2</sub>B<sub>2</sub>(NHC)<sub>2</sub> at the PBE0/TZ2P-ZORA level using CO (S) + Li<sub>2</sub>B<sub>2</sub>(NHC)<sub>2</sub> (S) as interacting fragments. The eigenvalues  $v$  indicate the size of the charge flow, and the

direction of charge flow is red→blue. The isovalue for  $\Delta\rho_{(1)-(3)}$  is 0.001 au.  $\Delta E_{\text{orb}(1)}$  in Table 3 is the sum of  $\Delta\rho_{(1)}$  and  $\Delta\rho_{(3)}$ .

Coordinates and total energy of the singlet (S) and triplet (T) state of  $B_2^{2-}$ ,  $M_2B_2$ , and  $M_3B_2^+$  (M = Li, Na) determined by CASPT2(8,8)/cc-pVTZ optimization.

$B_2^{2-}$  (S)

E = -49.14032899 a.u.

|   |             |             |              |
|---|-------------|-------------|--------------|
| B | 0.000000000 | 0.000000000 | 0.778994404  |
| B | 0.000000000 | 0.000000000 | -0.778994404 |

$B_2^{2-}$  (T)

E = -49.14716576 a.u.

|   |             |             |              |
|---|-------------|-------------|--------------|
| B | 0.000000000 | 0.000000000 | 0.808364794  |
| B | 0.000000000 | 0.000000000 | -0.808364794 |

$LiB_2^-$  (S)

E = -56.83945924 a.u.

|    |              |             |              |
|----|--------------|-------------|--------------|
| B  | 0.776936791  | 0.000000000 | -0.489098629 |
| B  | -0.776936791 | 0.000000000 | -0.489098629 |
| Li | 0.000000000  | 0.000000000 | 1.530550984  |

$LiB_2^-$  (T)

E = -56.84275391 a.u.

|    |              |             |              |
|----|--------------|-------------|--------------|
| B  | 0.805427039  | 0.000000000 | -0.519814933 |
| B  | -0.805427039 | 0.000000000 | -0.519814933 |
| Li | 0.000000000  | 0.000000000 | 1.591983591  |

$NaB_2^-$  (S)

E = -211.24127360 a.u.

|    |             |              |              |
|----|-------------|--------------|--------------|
| B  | 0.000000000 | 0.783206082  | -1.274952701 |
| B  | 0.000000000 | -0.783206082 | -1.274952701 |
| Na | 0.000000000 | 0.000000000  | 1.194483402  |

$NaB_2^-$  (T)

E = -211.25227297 a.u.

|    |             |              |              |
|----|-------------|--------------|--------------|
| B  | 0.000000000 | 0.810585039  | -1.263091271 |
| B  | 0.000000000 | -0.810585039 | -1.263091271 |
| Na | 0.000000000 | 0.000000000  | 1.270760543  |

$Li_2B_2$  (S)

E = -64.34289223 a.u.

|    |              |              |              |
|----|--------------|--------------|--------------|
| B  | 0.769547100  | 0.000000000  | 0.364124836  |
| B  | -0.769547100 | 0.000000000  | 0.364124836  |
| Li | 0.000000000  | -1.791142494 | -0.622727836 |
| Li | 0.000000000  | 1.791142494  | -0.622727836 |

Li<sub>2</sub>B<sub>2</sub> (T)

E = -64.33283056 a.u.

|    |              |              |             |
|----|--------------|--------------|-------------|
| B  | -0.793782120 | 0.000000000  | 0.000000000 |
| B  | 0.793782120  | 0.000000000  | 0.000000000 |
| Li | 0.000000000  | 2.076013007  | 0.000000000 |
| Li | 0.000000000  | -2.076013007 | 0.000000000 |

Na<sub>2</sub>B<sub>2</sub> (S)

E = -373.15009157 a.u.

|    |              |              |              |
|----|--------------|--------------|--------------|
| B  | 0.778147627  | 0.000000000  | 0.530712936  |
| B  | -0.778147627 | 0.000000000  | 0.530712936  |
| Na | 0.000000000  | -2.042474027 | -0.792270936 |
| Na | 0.000000000  | 2.042474027  | -0.792270936 |

Na<sub>2</sub>B<sub>2</sub> (T)

E = -373.14520007 a.u.

|    |              |              |             |
|----|--------------|--------------|-------------|
| B  | -0.800004227 | 0.000000000  | 0.000000000 |
| B  | 0.800004227  | 0.000000000  | 0.000000000 |
| Na | 0.000000000  | 2.437328760  | 0.000000000 |
| Na | 0.000000000  | -2.437328760 | 0.000000000 |

Li<sub>3</sub>B<sub>2</sub><sup>+</sup> (S)

E = -71.69143840 a.u.

|    |              |              |              |
|----|--------------|--------------|--------------|
| Li | 0.000000000  | 2.131407941  | 0.000000000  |
| B  | 0.000000000  | 0.000000327  | 0.765702582  |
| Li | -1.845852972 | -1.065703797 | 0.000000000  |
| Li | 1.845852972  | -1.065703797 | 0.000000000  |
| B  | 0.000000000  | 0.000000327  | -0.765702582 |

Li<sub>3</sub>B<sub>2</sub><sup>+</sup> (T)

E = -71.65169167 a.u.

|    |              |              |              |
|----|--------------|--------------|--------------|
| Li | 0.000000000  | 2.330035320  | 0.000000000  |
| B  | 0.000000000  | 0.150068055  | 0.797090521  |
| Li | -1.583542735 | -1.315085215 | 0.000000000  |
| Li | 1.583542735  | -1.315085215 | 0.000000000  |
| B  | 0.000000000  | 0.150068055  | -0.797090521 |

II-Li<sub>3</sub>B<sub>2</sub><sup>+</sup> (T)

E = -71.66348921 a.u.

|    |              |             |              |
|----|--------------|-------------|--------------|
| Li | 0.000000000  | 0.000000000 | -2.525246396 |
| Li | 2.157178363  | 0.000000000 | 0.571529113  |
| B  | 0.000000000  | 0.000000000 | -0.350901049 |
| Li | -2.157178363 | 0.000000000 | 0.571529113  |
| B  | 0.000000000  | 0.000000000 | 1.211844219  |

Na<sub>3</sub>B<sub>2</sub><sup>+</sup> (S)

E = -534.92157369 a.u.

|    |              |              |              |
|----|--------------|--------------|--------------|
| Na | 0.000000000  | 2.498444600  | 0.000000000  |
| B  | 0.000000000  | -0.000000579 | 0.773108004  |
| Na | -2.163718213 | -1.249221221 | 0.000000000  |
| Na | 2.163718213  | -1.249221221 | 0.000000000  |
| B  | 0.000000000  | -0.000000579 | -0.773108004 |

Na<sub>3</sub>B<sub>2</sub><sup>+</sup> (T)

E = -534.89366690 a.u.

|    |              |              |              |
|----|--------------|--------------|--------------|
| Na | 0.000000000  | 2.675843992  | 0.000000000  |
| B  | 0.000000000  | 0.146322502  | 0.801095379  |
| Na | -1.921721513 | -1.484243998 | 0.000000000  |
| Na | 1.921721513  | -1.484243998 | 0.000000000  |
| B  | 0.000000000  | 0.146322502  | -0.801095379 |

II-Na<sub>3</sub>B<sub>2</sub><sup>+</sup> (T)

E = -534.89917526 a.u.

|    |              |             |              |
|----|--------------|-------------|--------------|
| B  | 0.000000000  | 0.000000000 | -1.483285984 |
| Na | -2.512068462 | 0.000000000 | -0.992002795 |
| B  | 0.000000000  | 0.000000000 | 0.092057424  |
| Na | 0.000000000  | 0.000000000 | 2.601980778  |
| Na | 2.512068462  | 0.000000000 | -0.992002795 |

Cartesian coordinates at the PBE0-D3(BJ)/def2-TZVPP level

B<sub>2</sub>Li<sub>2</sub>(NHC)<sub>2</sub>

|    |             |             |             |
|----|-------------|-------------|-------------|
| B  | -0.13427900 | 0.75378500  | 0.00000000  |
| B  | 0.13427900  | -0.75378500 | 0.00000000  |
| Li | 1.90933200  | 0.34003700  | 0.00000000  |
| Li | -1.90933200 | -0.34003700 | 0.00000000  |
| N  | 0.48468100  | 3.00997400  | 1.10327000  |
| C  | 0.05726700  | 2.59586300  | 2.40456600  |
| C  | 0.48468100  | 4.32465000  | 0.67210000  |
| C  | 0.48468100  | 4.32465000  | -0.67210000 |

N 0.48468100 3.00997400 -1.10327000  
C 0.05726700 2.59586300 -2.40456600  
H 0.56399400 5.14780500 1.36184400  
H 0.56399400 5.14780500 -1.36184400  
C 0.32277200 2.15759100 0.00000000  
N -0.48468100 -3.00997400 1.10327000  
C -0.05726700 -2.59586300 2.40456600  
C -0.48468100 -4.32465000 0.67210000  
C -0.48468100 -4.32465000 -0.67210000  
N -0.48468100 -3.00997400 -1.10327000  
C -0.05726700 -2.59586300 -2.40456600  
H -0.56399400 -5.14780500 1.36184400  
H -0.56399400 -5.14780500 -1.36184400  
C -0.32277200 -2.15759100 0.00000000  
H 0.28729300 3.37585700 3.13048900  
H -1.02352700 2.38584900 2.40536800  
H 0.56041100 1.67163200 2.68766400  
H 0.28729300 3.37585700 -3.13048900  
H 0.56041100 1.67163200 -2.68766400  
H -1.02352700 2.38584900 -2.40536800  
H -0.56041100 -1.67163200 2.68766400  
H -0.28729300 -3.37585700 3.13048900  
H 1.02352700 -2.38584900 2.40536800  
H 1.02352700 -2.38584900 -2.40536800  
H -0.28729300 -3.37585700 -3.13048900  
H -0.56041100 -1.67163200 -2.68766400

$B_2Li_2(PPh_3)_2$

B 0.34194100 0.68281500 0.06230400  
B -0.34194100 -0.68281500 0.06230400  
Li -1.95587700 0.64824600 0.13376900  
Li 1.95587700 -0.64824600 0.13376900  
P 0.00234200 2.46228300 0.00071200  
P -0.00234200 -2.46228300 0.00071200  
C -1.77758700 2.90377100 -0.03725500  
C -2.52266300 2.57953700 -1.19448300  
C -2.49825200 3.12506500 1.15508700  
C -3.90796100 2.52593000 -1.16184800  
H -1.99891800 2.38624700 -2.12468800  
C -3.88178800 3.06849200 1.17389000



H -1.95747000 3.35558200 2.06551100  
C -4.60254600 2.77958400 0.01731000  
H -4.45046900 2.29376300 -2.07111300  
H -4.40680300 3.26403500 2.10186800  
H -5.68363700 2.73708700 0.03864500  
C 0.60926500 3.35447400 1.46007400  
C 0.62990900 4.74526500 1.51020900  
C 1.03024500 2.61944700 2.56264400  
C 1.07016600 5.39295000 2.65546600  
H 0.30652200 5.32579000 0.65508800  
C 1.45474700 3.26768500 3.71122400  
H 1.01913200 1.53569000 2.49239900  
C 1.47970100 4.65604900 3.75697100  
H 1.09379500 6.47573100 2.68671700  
H 1.77123300 2.68981400 4.57152800  
H 1.82231300 5.16374600 4.65082400  
C 0.64873200 3.28331600 -1.48939900  
C 1.70518800 2.70110500 -2.17926900  
C 0.11885500 4.48979400 -1.94077200  
C 2.22970600 3.31683600 -3.30379100  
H 2.09238100 1.75370800 -1.81767400  
C 0.64689600 5.10797700 -3.06355300  
H -0.72440600 4.93379000 -1.42423000  
C 1.70518800 4.52403000 -3.74512600  
H 3.04899200 2.85265200 -3.84009600  
H 0.22799100 6.04532100 -3.40990400  
H 2.11763600 5.00779100 -4.62264900  
C -0.60926500 -3.35447400 1.46007400  
C -1.03024500 -2.61944700 2.56264400  
C -0.62990900 -4.74526500 1.51020900  
C -1.45474700 -3.26768500 3.71122400  
H -1.01913200 -1.53569000 2.49239900  
C -1.07016600 -5.39295000 2.65546600  
H -0.30652200 -5.32579000 0.65508800  
C -1.47970100 -4.65604900 3.75697100  
H -1.77123300 -2.68981400 4.57152800  
H -1.09379500 -6.47573100 2.68671700  
H -1.82231300 -5.16374600 4.65082400  
C -0.64873200 -3.28331600 -1.48939900  
C -0.11885500 -4.48979400 -1.94077200  
C -1.70518800 -2.70110500 -2.17926900  
C -0.64689600 -5.10797700 -3.06355300  
H 0.72440600 -4.93379000 -1.42423000  
C -2.22970600 -3.31683600 -3.30379100

H -2.09238100 -1.75370800 -1.81767400  
C -1.70518800 -4.52403000 -3.74512600  
H -0.22799100 -6.04532100 -3.40990400  
H -3.04899200 -2.85265200 -3.84009600  
H -2.11763600 -5.00779100 -4.62264900  
C 1.77758700 -2.90377100 -0.03725500  
C 2.49825200 -3.12506500 1.15508700  
C 2.52266300 -2.57953700 -1.19448300  
C 3.88178800 -3.06849200 1.17389000  
H 1.95747000 -3.35558200 2.06551100  
C 3.90796100 -2.52593000 -1.16184800  
H 1.99891800 -2.38624700 -2.12468800  
C 4.60254600 -2.77958400 0.01731000  
H 4.40680300 -3.26403500 2.10186800  
H 4.45046900 -2.29376300 -2.07111300  
H 5.68363700 -2.73708700 0.03864500

B<sub>2</sub>(NHC)<sub>2</sub>

B 0.00005100 0.72813600 -0.00002800  
B -0.00005100 -0.72813600 -0.00002800  
N 0.66452900 3.04880400 0.85508800  
C 1.52705100 2.56551500 1.89504300  
C 0.41878600 4.36222500 0.52965400  
C 0.00002200 2.21077700 -0.00002300  
H 2.51254400 2.30403600 1.50092400  
H 1.63179500 3.32828500 2.66580500  
H 1.08441000 1.66096900 2.31758700  
C -0.41888500 4.36221700 -0.52962500  
H 0.85585000 5.18029400 1.07468900  
N -0.66452900 3.04878700 -0.85511000  
H -0.85598300 5.18027200 -1.07465300  
C -1.52709200 2.56547700 -1.89502000  
H -2.51251200 2.30385100 -1.50081900  
H -1.63199700 3.32829600 -2.66571200  
H -1.08439400 1.66102200 -2.31769700  
N -0.66452900 -3.04880400 0.85508800  
C -1.52705100 -2.56551500 1.89504300  
C -0.41878600 -4.36222500 0.52965400  
C -0.00002200 -2.21077700 -0.00002300  
H -1.08441000 -1.66096900 2.31758700  
H -2.51254400 -2.30403600 1.50092400  
H -1.63179500 -3.32828500 2.66580500  
C 0.41888500 -4.36221700 -0.52962500

H -0.85585000 -5.18029400 1.07468900  
N 0.66452900 -3.04878700 -0.85511000  
H 0.85598300 -5.18027200 -1.07465300  
C 1.52709200 -2.56547700 -1.89502000  
H 2.51251200 -2.30385100 -1.50081900  
H 1.63199700 -3.32829600 -2.66571200  
H 1.08439400 -1.66102200 -2.31769700

CO<sub>2</sub>-B<sub>2</sub>(NHC)<sub>2</sub>

B -0.62545300 -0.51341000 0.50858300  
B 0.74269800 -1.08437200 0.37774700  
P -2.38230600 -0.19080500 0.12491300  
P 2.28034400 -0.07568200 0.12010700  
C -3.09970700 -1.58079500 -0.77272100  
C -2.25620800 -2.60284500 -1.20188200  
C -4.47124700 -1.64175900 -1.01906000  
C -2.79674200 -3.68247800 -1.88643000  
H -1.18947900 -2.57961000 -0.98934900  
C -4.99412300 -2.71318500 -1.72104700  
H -5.12909800 -0.86049800 -0.65751400  
C -4.15552700 -3.73387500 -2.15408900  
H -2.14126000 -4.48524500 -2.20009000  
H -6.05773200 -2.75946900 -1.92081000  
H -4.56992800 -4.57751400 -2.69326500  
C -3.47604500 0.11462100 1.53899000  
C -4.61763400 0.90506800 1.44007600  
C -3.15718200 -0.50015500 2.74578000  
C -5.44067800 1.06971500 2.54329000  
H -4.85496900 1.40494600 0.50810100  
C -3.98767400 -0.34021100 3.84290600  
H -2.24748000 -1.08807500 2.81857300  
C -5.12845100 0.44407400 3.74195200  
H -6.32494400 1.69089600 2.46834200  
H -3.73915100 -0.82187000 4.78055700  
H -5.77233400 0.57541800 4.60317900  
C -2.47580200 1.30261600 -0.88459400  
C -2.16646400 2.52847000 -0.29644000  
C -2.80182300 1.24082500 -2.23547500  
C -2.19467300 3.68460500 -1.05734500  
H -1.90781700 2.57494000 0.75482200  
C -2.83990900 2.40462400 -2.98786000  
H -3.03138200 0.28582800 -2.69181300  
C -2.53937200 3.62499100 -2.40019500  
H -1.94636300 4.63431800 -0.60028100

H -3.10679500 2.35654900 -4.03660700  
H -2.56942800 4.53223700 -2.99143600  
C 3.57643800 -0.89081900 -0.84526400  
C 3.98589800 -2.16563500 -0.45241200  
C 4.17467100 -0.27294600 -1.93915400  
C 4.98818200 -2.80857900 -1.15800200  
H 3.51750800 -2.65012500 0.39745700  
C 5.17828000 -0.92572900 -2.63982100  
H 3.85680200 0.71528000 -2.24695900  
C 5.58455700 -2.19232500 -2.25003300  
H 5.29869900 -3.80089200 -0.85530000  
H 5.63995800 -0.44253000 -3.49238400  
H 6.36570700 -2.70327400 -2.80020400  
C 1.91936500 1.47134600 -0.74737300  
C 2.40916100 2.69741700 -0.31250500  
C 1.13060600 1.40927400 -1.89633500  
C 2.11346700 3.85343200 -1.02200500  
H 3.01384800 2.75131800 0.58400800  
C 0.85256800 2.56233500 -2.60805200  
H 0.72724700 0.45530500 -2.21488700  
C 1.34213800 3.78620300 -2.17120900  
H 2.49042500 4.80744500 -0.67366700  
H 0.23823000 2.50787400 -3.49763500  
H 1.11463600 4.68908600 -2.72530700  
C 3.07178700 0.36435300 1.68533600  
C 4.41806300 0.71973500 1.72671900  
C 2.31687400 0.34675100 2.85261500  
C 4.99862800 1.08120700 2.93117300  
H 5.01246800 0.70088100 0.82073600  
C 2.90500600 0.70652300 4.05498200  
H 1.28141200 0.02926800 2.80477800  
C 4.24096200 1.07708200 4.09461600  
H 6.04584700 1.35618500 2.96373900  
H 2.32043700 0.68235300 4.96645200  
H 4.69911600 1.35074000 5.03759400  
C 1.01564400 -2.73118700 0.68581800  
O 0.68868300 -3.48511200 -0.22807200  
O 1.58267200 -2.89264200 1.76838700

CO-B<sub>2</sub>(NHC)<sub>2</sub>

B 0.01880100 0.78152300 0.25876400  
B -0.01880100 -0.78152300 0.25876400  
C 0.00000000 0.00000000 1.55077000

O 0.00000000 0.00000000 2.80189800  
N -0.48856500 2.81581300 -1.29879600  
C -0.91646600 2.05050800 -2.44126200  
C -0.45791700 4.18367400 -1.20182300  
C -0.06523700 2.24526100 -0.14189800  
H -1.93288400 2.32610300 -2.72519900  
H -0.24672500 2.21527100 -3.28705600  
H -0.89183600 1.00143100 -2.14570800  
C 0.00000000 4.47546700 0.03914100  
H -0.76879100 4.82952900 -2.00453500  
N 0.22563100 3.28518900 0.67716700  
H 0.17110400 5.42491500 0.51549300  
C 0.71318100 3.12488200 2.03343500  
H 1.80096600 3.21201600 2.05469100  
H 0.27743200 3.90393500 2.65839600  
H 0.42602600 2.13695100 2.40603100  
N 0.48856500 -2.81581300 -1.29879600  
C 0.91646600 -2.05050800 -2.44126200  
C 0.45791700 -4.18367400 -1.20182300  
C 0.06523700 -2.24526100 -0.14189800  
H 0.89183600 -1.00143100 -2.14570800  
H 1.93288400 -2.32610300 -2.72519900  
H 0.24672500 -2.21527100 -3.28705600  
C 0.00000000 -4.47546700 0.03914100  
H 0.76879100 -4.82952900 -2.00453500  
N -0.22563100 -3.28518900 0.67716700  
H -0.17110400 -5.42491500 0.51549300  
C -0.71318100 -3.12488200 2.03343500  
H -1.80096600 -3.21201600 2.05469100  
H -0.27743200 -3.90393500 2.65839600  
H -0.42602600 -2.13695100 2.40603100

$\text{N}_2\text{-B}_2(\text{NHC})_2$

B -0.77347000 -0.17367000 0.31837000  
B 0.77363100 -0.18700700 0.30753500  
N -2.83880200 1.34185300 -0.05442900  
C -2.12048600 2.58604900 -0.00382200  
C -4.18644400 1.17981400 -0.24880400  
C -2.23057200 0.12883300 0.06496900  
H -1.11136200 2.40541600 -0.37463600  
H -2.62064200 3.32475500 -0.62878100  
H -2.05421500 2.96112500 1.02002000

C -4.42573600 -0.15320200 -0.25120200  
H -4.85641000 2.01264700 -0.37431400  
N -3.22758100 -0.78632700 -0.04774100  
H -5.34618000 -0.69750100 -0.36948300  
C -3.04872800 -2.20205500 0.19444600  
H -3.20153500 -2.41160200 1.25522600  
H -3.78527900 -2.75361200 -0.38947900  
H -2.02001100 -2.53009600 -0.07728600  
N 2.85119600 1.32848700 0.08210400  
C 2.14030200 2.57064300 0.21509000  
C 4.19469700 1.17804400 -0.15103100  
C 2.23148100 0.11470100 0.06933100  
H 1.31190800 2.42415900 0.90798300  
H 2.81310000 3.33510400 0.60107600  
H 1.73647300 2.89440000 -0.74764000  
C 4.42332100 -0.14840900 -0.29332000  
H 4.87071200 2.01471900 -0.18818300  
N 3.22127700 -0.79170400 -0.14587900  
H 5.34012100 -0.68481900 -0.46430600  
C 3.04483300 -2.22436800 -0.03676400  
H 3.70800200 -2.71763700 -0.74777100  
H 3.30120200 -2.54715500 0.97452400  
H 1.99118600 -2.51670300 -0.23116900  
N -0.00991900 -1.44740100 0.21297100  
N -0.02672500 -2.62920900 -0.13969300

CO<sub>2</sub>-Li<sub>2</sub>B<sub>2</sub>(NHC)<sub>2</sub>

B -0.69070900 -0.18503900 0.49314400  
B 0.72760200 0.40994100 0.18880000  
Li -1.02361200 1.03636000 -1.37241900  
Li 0.07606200 1.61928800 1.99922900  
N -3.27080300 -0.31666100 0.92573200  
C -3.21345100 0.16675100 2.26481900  
C -4.30867800 -0.01092300 0.06646400  
C -3.90112600 -0.06381400 -1.20435100  
N -2.50706000 -0.40179400 -1.25103300  
C -2.27255100 -1.69754200 -1.89059100  
H -5.29307900 0.21472700 0.44771000  
H -4.47675900 0.03442600 -2.10991700  
C -2.07555800 -0.33172300 0.15868700  
N 3.28780900 0.16795400 -0.23617100  
C 3.53610400 1.53474300 -0.63884200

C 4.24505900 -0.81283400 -0.17599900  
C 3.62869600 -1.94434800 0.23111300  
N 2.30376100 -1.63572600 0.40921000  
C 1.28230400 -2.56171800 0.81569800  
H 5.27395200 -0.62531500 -0.42726200  
H 4.01563200 -2.93302100 0.40361500  
C 2.07203600 -0.32529400 0.12628700  
H -4.20190700 0.12828300 2.72358700  
H -2.53259800 -0.45680600 2.84916500  
H -2.84245000 1.20795600 2.30796900  
H -2.60092200 -1.65423200 -2.93174000  
H -1.20385300 -1.90994500 -1.86555100  
H -2.81274300 -2.50376500 -1.37913100  
H 3.28324100 2.22157000 0.16831100  
H 4.59044800 1.63276100 -0.88880200  
H 2.92837600 1.79115800 -1.50596100  
H 0.59849800 -2.76381800 -0.00958000  
H 1.75521900 -3.48476900 1.14771300  
H 0.68792500 -2.11945400 1.61888300  
C 0.65658900 2.01388800 -0.08915700  
O 0.83262200 2.81281000 0.88995200  
O 0.27946800 2.39084900 -1.23471600

CO-Li<sub>2</sub>B<sub>2</sub>(NHC)<sub>2</sub>

B -0.91350000 -0.30481700 0.15016700  
B 0.70189000 -0.12367600 -0.18034900  
Li 0.60809100 -0.16840600 1.82899200  
Li 1.73022800 -1.90174700 -0.99731300  
C -0.10799400 -1.44776800 -0.30450500  
O 0.05840600 -2.63199900 -0.77480800  
N -2.93356100 1.33349200 0.06716800  
C -2.16455400 2.54869300 0.10685600  
C -4.30512400 1.24474800 0.00821300  
C -2.37286700 0.09320400 0.08154100  
H -2.45775100 3.21085000 -0.70885000  
H -2.30477000 3.06767400 1.05825100  
H -1.11663900 2.27244100 -0.00719200  
C -4.61141800 -0.07114400 -0.02162400  
H -4.93910700 2.11346200 -0.02363600  
N -3.42653100 -0.76429200 0.00980600  
H -5.56509700 -0.56614300 -0.07726000  
C -3.28166500 -2.20049600 0.02432800  
H -3.29309300 -2.57671000 1.05036500

H -4.10407800 -2.64798800 -0.53256000  
H -2.32874600 -2.47055400 -0.43097800  
N 2.84465100 1.40101700 0.11654300  
C 2.11128100 2.58686700 -0.20702400  
C 4.04971400 1.13657600 -0.49814100  
C 2.11371900 0.15539000 0.13959700  
H 1.38038300 2.80112100 0.57576900  
H 2.79103500 3.43705500 -0.28070000  
H 1.55802700 2.47161900 -1.15273100  
C 4.26076000 -0.18104000 -0.60761400  
H 4.69219900 1.94333800 -0.82052300  
N 3.16128100 -0.89133600 -0.00354200  
H 5.13830100 -0.70061700 -0.95771800  
C 3.57113700 -1.46710800 1.27992000  
H 4.38311000 -2.18288200 1.12442000  
H 3.91543000 -0.69479400 1.98062400  
H 2.72782400 -2.00865400 1.71795500

$\text{N}_2\text{-Li}_2\text{B}_2(\text{NHC})_2$

B -0.87945000 -0.20434300 0.27023900  
B 0.68661300 -0.02326600 -0.14985200  
Li 0.63572000 0.24569600 1.88821700  
Li 1.66883300 -1.77554000 -1.13820800  
N -2.95570300 1.31945100 0.08844100  
C -2.23884200 2.54988900 0.25313900  
C -4.31997400 1.16942300 -0.02251200  
C -2.34237600 0.10151600 0.09125200  
H -1.31407200 2.50133200 -0.32300800  
H -2.85089400 3.37960500 -0.09692400  
H -1.97940400 2.71213800 1.30498800  
C -4.56233800 -0.15610400 -0.11506600  
H -4.99039400 2.01042300 -0.05414700  
N -3.34969700 -0.80162700 -0.06422500  
H -5.48877800 -0.69009900 -0.23349700  
C -3.15756300 -2.23297000 0.01250300  
H -3.24974400 -2.56715800 1.05068700  
H -3.92104100 -2.72580300 -0.58901200  
H -2.16283400 -2.50725500 -0.36801100  
N 2.90943000 1.36730400 0.08280400  
C 2.26236900 2.56285000 -0.37514200  
C 4.14350100 1.01216900 -0.43199700  
C 2.11846900 0.16063300 0.09552200  
H 1.47080600 2.85423000 0.31805000



H 2.98423200 3.37878200 -0.42912700  
H 1.79482700 2.41024000 -1.36074900  
C 4.27913000 -0.31568000 -0.49978300  
H 4.85829600 1.77089000 -0.71484600  
N 3.08998100 -0.94829400 0.00217500  
H 5.14409400 -0.89694800 -0.77581600  
C 3.33000000 -1.61959200 1.28048300  
H 4.08035200 -2.40337900 1.15118300  
H 3.68734100 -0.91813400 2.04719400  
H 2.40445100 -2.09310200 1.61536600  
N -0.11959400 -1.32254900 -0.28980400  
N -0.07312800 -2.45442600 -0.83720300
